# Supplementary material
Source: PubMed Central journal article supplement (PMC4831212)
Supplement: NIHMS775983-supplement-01.pdf [file NIHMS775983-supplement-01.pdf]

## SUPPLEMENTARY ONLINE DATA

# Polyphenols differentially inhibit degranulation of distinct subsets of vesicles in mast cells by specific interaction with granule-type-dependent SNARE complexes

Yoosoo YANG\*<sup>†1</sup>, Jung-Mi OH\*<sup>1</sup>, Paul HEO\*<sup>1</sup>, Jae Yoon SHIN\*, Byoungjae KONG\*, Jonghyeok SHIN\*, Ji-Chun LEE\*, Jeong Su OH\*, Kye Won PARK<sup>‡</sup>, Choong Hwan LEE<sup>§</sup>, Yeon-Kyun SHIN<sup>†||2</sup> and Dae-Hyuk KWEON\*<sup>2</sup>

\*Department of Genetic Engineering, College of Biotechnology and Bioengineering, and Center for Human Interface Nano Technology, Sungkyunkwan University, Suwon, Gyeonggi-do 440-746, South Korea, <sup>†</sup>Biomedical Research Institute, Korea Institute of Science and Technology, Seoul 136-791, South Korea, <sup>‡</sup>Department of Food Science and Biotechnology, College of Biotechnology and Bioengineering, Sungkyunkwan University, Suwon, Gyeonggi-do 440-746, South Korea, <sup>§</sup>Department of Bioscience and Biotechnology, Konkuk University, Seoul 143-701, South Korea, and <sup>||</sup>Department of Biochemistry, Biophysics and Molecular Biology, Iowa State University, Ames, IA 50011, U.S.A.

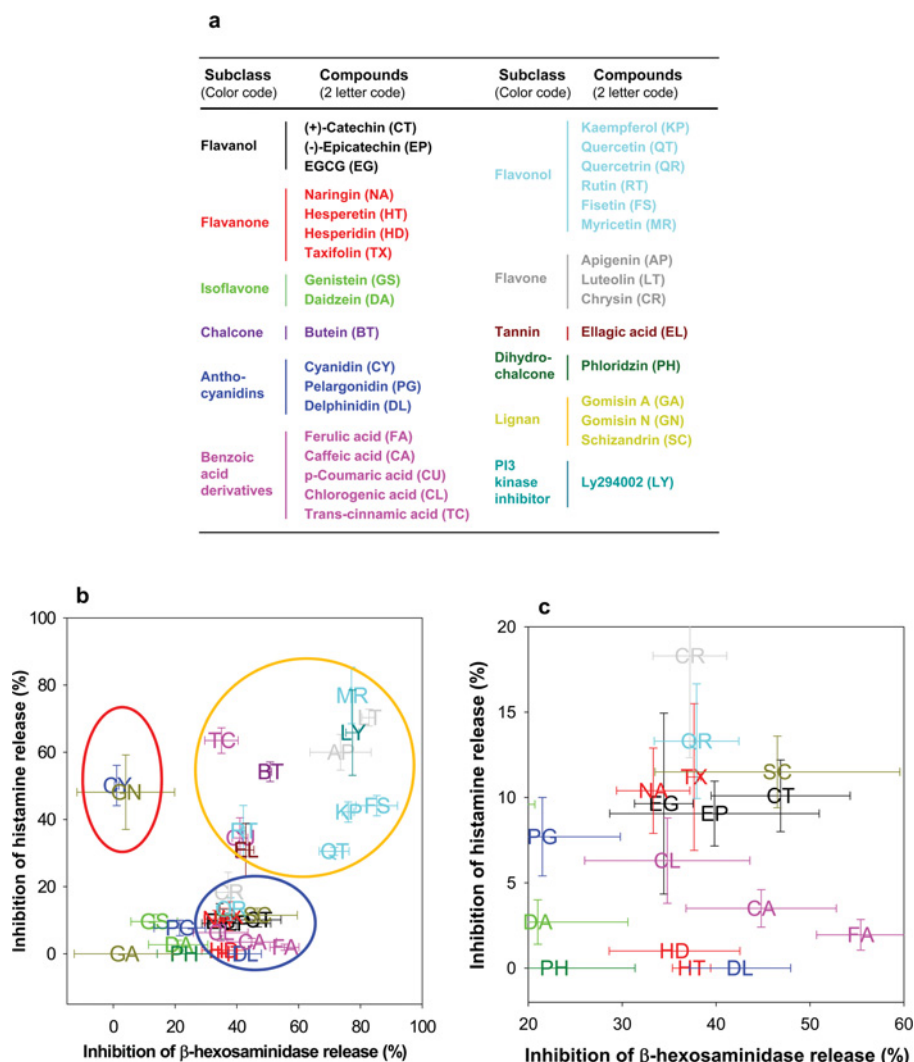

**Figure S1** Effect of polyphenols on DNP-BSA-induced mast cell degranulation

(a) All 32 phenolic compounds used representing 11 subgroups and their abbreviations. (b and c) Inhibitory effect of polyphenols on  $\beta$ -hexosaminidase and histamine release from the RBL-2H3 cells. RBL-2H3 cells were treated with or without 10  $\mu$ M polyphenols. Results are means  $\pm$  S.D. from five independent experiments. Dense area of (b) is shown enlarged in (c) for clarity.

<sup>1</sup> These authors contributed equally to this work.

<sup>2</sup> Correspondence may be addressed to either of these addresses (email dhkweon@skku.edu or colishin@iastate.edu).

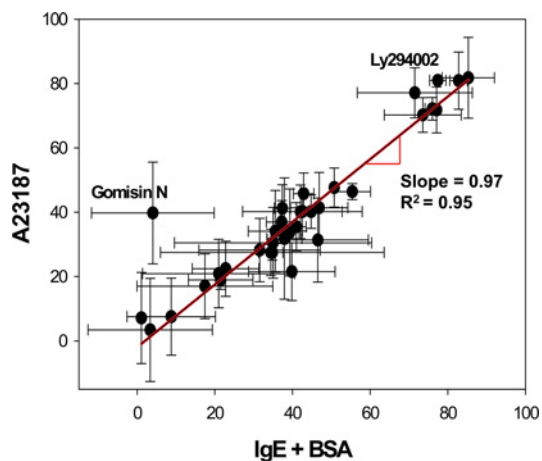

**Figure S2 Effect of polyphenols on mast cell degranulation is independent of stimulation method**

$\beta$ -Hexosaminidase release from RBL-2H3 cells was stimulated by either Fc $\epsilon$ RI cross-linking or calcium ionophore A23187 in the presence or absence of polyphenols.

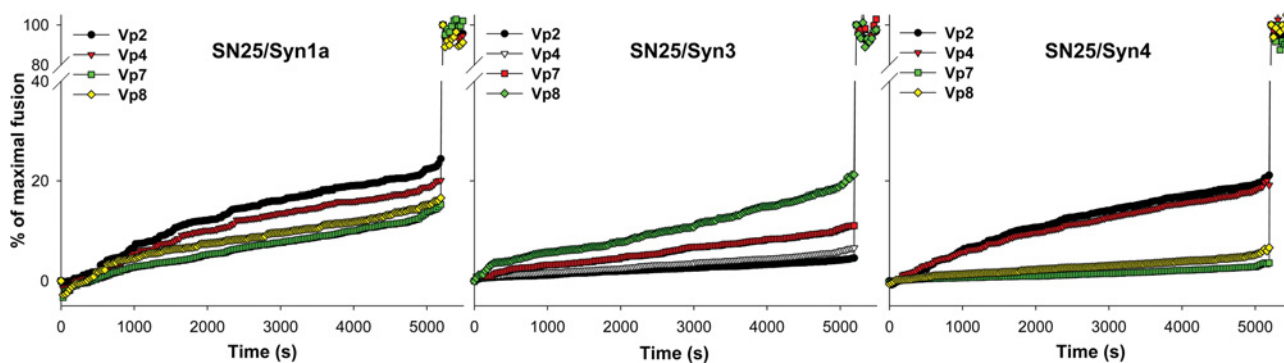

**Figure S3 The lipid mixing ability of various SN25-containing SNARE complexes**

SNAP-25 or Syn1a could induce lipid mixing with various VAMPs, but these proteins are not expressed in mast cells. SN25, 25 kDa synaptosome-associated protein; Vp, vesicle-associated membrane protein.

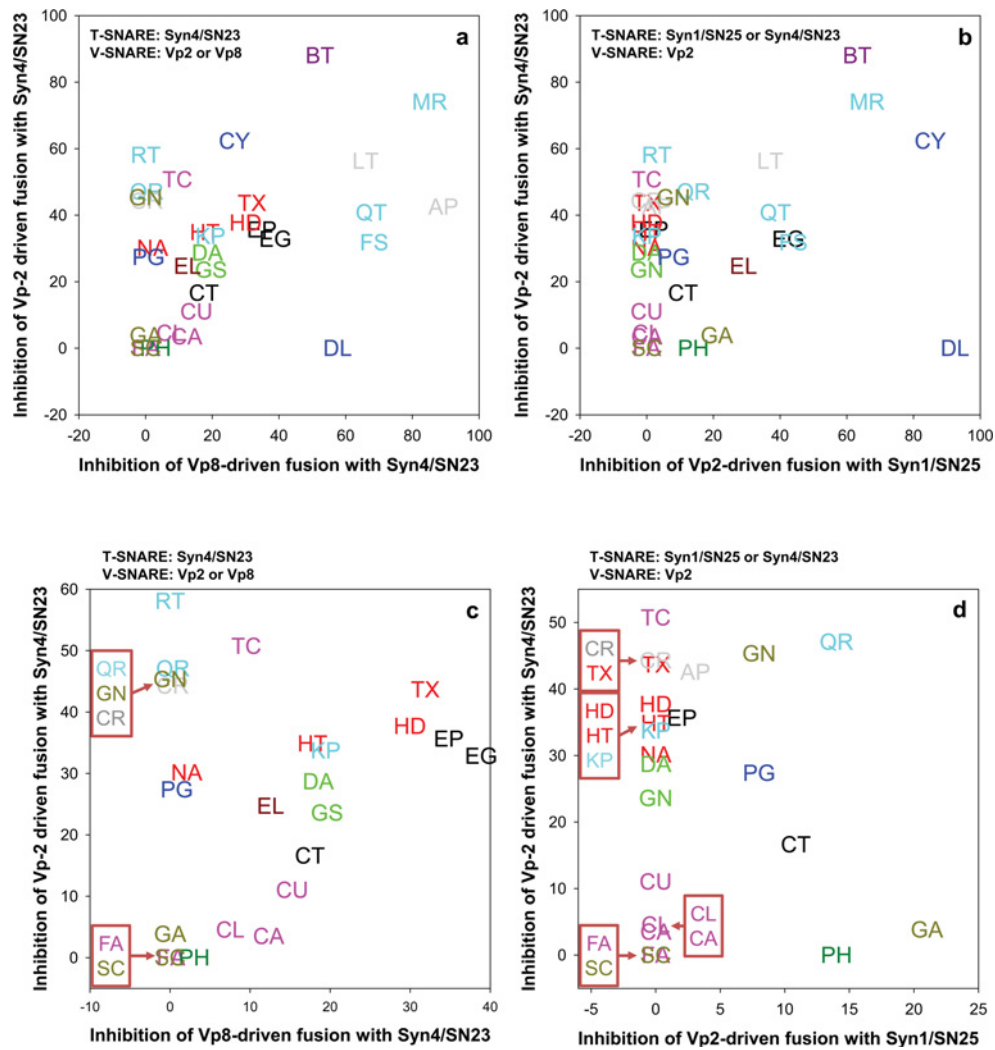

**Figure S4** Inhibitory effect of 32 polyphenols on membrane fusion driven by three SNARE complexes

(a) SNAP-23/Syn4/VAMP2 compared with SNAP-23/Syn4/VAMP8. (b) SNAP-23/Syn4/VAMP2 compared with SNAP-25/Syn1/VAMP2. Dense areas of (a) and (b) are shown enlarged in (c) and (d) respectively for better resolution. SN23/25, 23/25 kDa synaptosome-associated protein; Vp, vesicle-associated membrane protein.

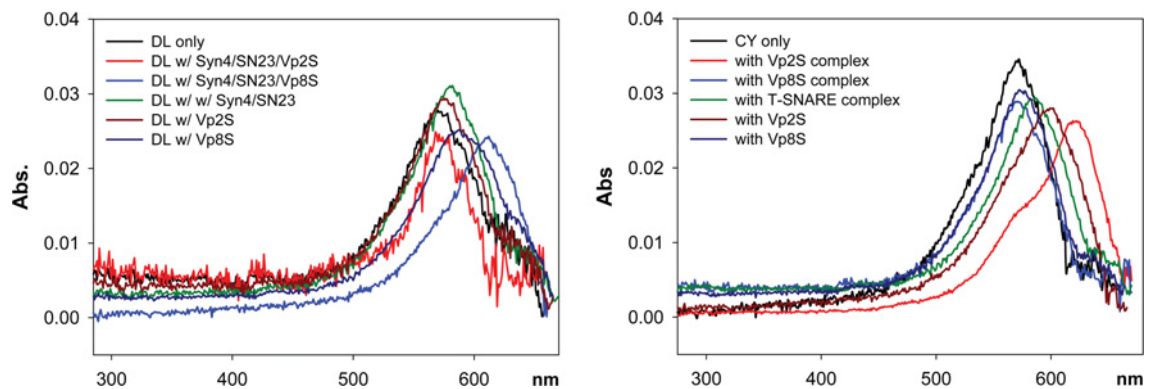

**Figure S5** UV absorption spectra of polyphenols DL and CY with SNARE proteins

Soluble fragments of SNARE proteins (Vp2S and Vp8S) and t-SNARE complex were mixed with polyphenols and UV spectra were measured. Abs., absorbance; CY, cyanidin; DL, delphinidin; SN23/25, 23/25 kDa synaptosome-associated protein; Vp, vesicle-associated membrane protein.

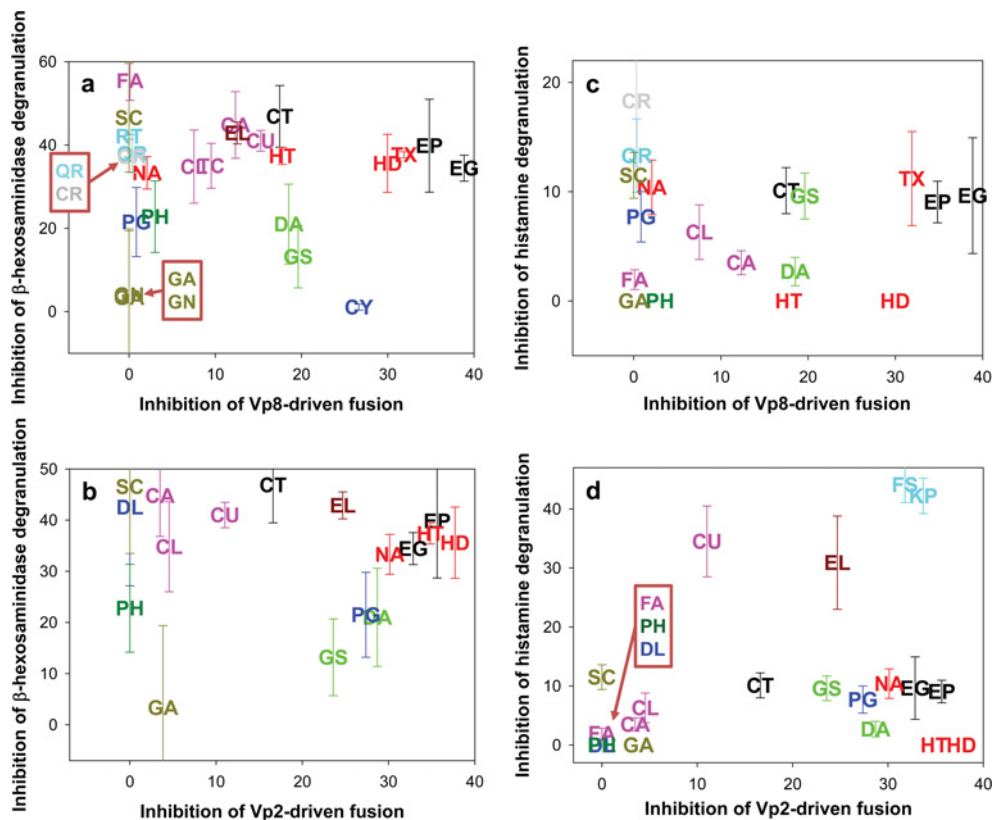

Figure S6 Dense areas of Figure 4 of the main text are shown enlarged

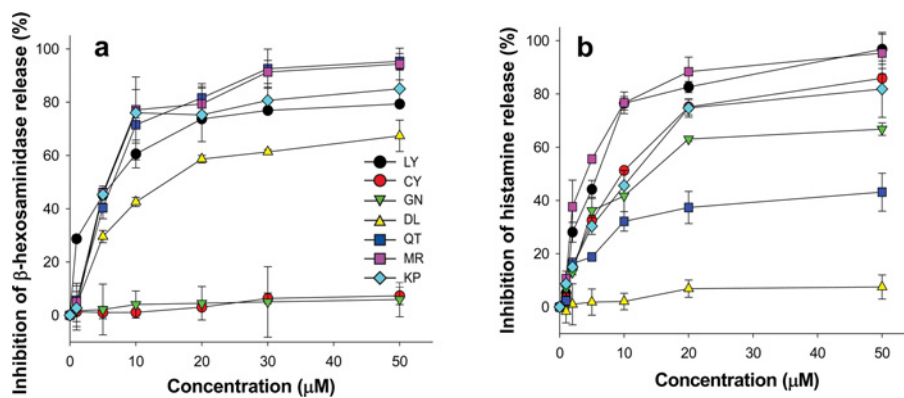

Figure S7 Determination of  $\text{IC}_{50}$  values of polyphenols for histamine and  $\beta$ -hexosaminidase release from RBL-2H3 cells

**Table S1 Primers and condition for PCR analysis of RBL-2H3 cells**

F, forward; R, reverse.

| Type           | Gene        | Primer type            | Primer sequence (5'→3') | Annealing temperature (°C) | Number of cycles | Amplicon size (bp) |
|----------------|-------------|------------------------|-------------------------|----------------------------|------------------|--------------------|
| v-SNAREs       | VAMP2       | F                      | ATGTCGGCTACCGTGCCAC     | 58                         | 28               | 348                |
|                |             | R                      | ATCGTTTACTTCAGCACT      |                            |                  |                    |
|                | VAMP8       | F                      | ATGGAGGCCAGTGGGAGTGC    | 58                         | 28               | 300                |
|                |             | R                      | GGCACCATCCCCACT         |                            |                  |                    |
|                | VAMP8S      | F                      | ATGGAGGCCAGTGGGAGTGC    | 58                         | 28               | 222                |
|                |             | R                      | GTTCTGGTGGAGAATGTGAAG   |                            |                  |                    |
|                | VAMP4       | F                      | ATGCCCTCCAAGTCAAGCG     | 58                         | 30               | 423                |
| R              |             | TAGTTGTGAAATACCGTACT   |                         |                            |                  |                    |
| VAMP7          | F           | ATGGCCATTCTTTTGCCGTTG  | 58                      | 28                         | 660              |                    |
|                | R           | GGCCAAGCTGTGTGAAGAAA   |                         |                            |                  |                    |
| t-SNAREs       | SNAP-23     | F                      | ATGGATGATCTATCACCAGA    | 52                         | 30               | 630                |
|                |             | R                      | AGAGCAAAGAACTCATTGACAGC |                            |                  |                    |
|                | SNAP-25     | F                      | ATGGCCGAGGACGCAGACAT    | 52                         | 40               | 618                |
|                |             | R                      | AAGATGCTGGGAAGTGGT      |                            |                  |                    |
|                | Syntaxin 1a | F                      | ATGAAGGACCGAACCCAGGA    | 56                         | 40               | 864                |
|                |             | R                      | ACCATCGGGGGCATCTTTGGA   |                            |                  |                    |
|                | Syntaxin 4  | F                      | ATGCGCGACAGGACCCATGA    | 56                         | 40               | 894                |
|                |             | R                      | CATCACCATAACCGTTGGA     |                            |                  |                    |
|                | Syntaxin 5  | F                      | ATGCCTGCCGGGATCGGAC     | 56                         | 40               | 903                |
|                |             | R                      | ATCTTTGTGGTCTTCCTTGCC   |                            |                  |                    |
| $\beta$ -Actin | F           | ATGGGTCAGAAGGACTCCTACG | 58                      | 18                         | 470              |                    |
|                | R           | CATTGTGATGGACTCCGGAGA  |                         |                            |                  |                    |

Received 28 August 2012/14 December 2012; accepted 19 December 2012

Published as BJ Immediate Publication 19 December 2012, doi:10.1042/BJ20121256
